# Supplementary material for: Disparate Remodeling of the Extracellular Matrix and Proteoglycans in Failing Pediatric Versus Adult Hearts
Source: PubMed Central journal article supplement — J Am Heart Assoc. 2018 Sep 29;7(19):e010427. doi: 10.1161/JAHA.118.010427 (PMC6404896; doi:10.1161/jaha.118.010427), 2018-09-29
Supplement: JAH3-7-e010427-s001.pdf [file JAH3-7-e010427-s001.pdf]

# **SUPPLEMENTAL MATERIAL**

**Table S1. Clinical characteristics of pediatric and adult patients with DCM.**

|                                   | <b>Pediatric DCM</b><br>Median (IQR) | <b>Adult DCM</b><br>Median (IQR) |
|-----------------------------------|--------------------------------------|----------------------------------|
| n                                 | 15                                   | 24                               |
| Age at transplant (years)         | 2.42 (0.96-7.58)                     | 51 (40-61)                       |
| Sex (Male)                        | 8/15                                 | 18/25                            |
| Disease duration (months)         | 2 (0.87-12.5)                        | 66 (5.8-102)                     |
| <b>Anthropometric</b>             |                                      |                                  |
| Weight (kg)                       | 12.8 (9.5-34)                        | 80 (72-86)                       |
| Height (m)                        | 0.84 (0.79-1.35)                     | 1.73 (1.68-1.8)                  |
| BMI (kg/m <sup>2</sup> )          | 16.35 (15.1-20)                      | 25.86 (24.09-28.73)              |
| <b>Blood parameter</b>            |                                      |                                  |
| Hemoglobin (g/L)                  | 105 (91.75-119.25)                   | 122 (99-137)                     |
| Creatinine (micromole/L)          | 32.5 (21.25- 56.5)                   | 124 (95-145)                     |
| eGFR((ml/min/1.73m <sup>2</sup> ) | 95.8 (71.47-131.28)                  | 55.7 (42.8-70.8)                 |
| <b>Comorbidities</b>              |                                      |                                  |
| Liver disease                     | 3/15                                 | 4/24                             |
| Kidney disease                    | 1/15                                 | 9/24                             |
| COPD                              | 1/15                                 | 1/24                             |
| Thyroid                           | 0/15                                 | 7/24                             |
| DM                                | 0/15                                 | 2/24                             |
| Other diseases                    | 3/15                                 | 6/24                             |
| <b>Medications</b>                |                                      |                                  |
| ACEi/ARB                          | 9/15                                 | 17/24                            |
| β blocker                         | 8/15                                 | 18/24                            |
| Digoxin                           | 1/15                                 | 10/24                            |
| Anti-platelet                     | 1/15                                 | 3/24                             |
| Statin                            | 0/15                                 | 5/24                             |
| PPI                               | 3/15                                 | 7/24                             |
| Anti-arrhythmic                   | 2/15                                 | 3/24                             |
| Vitamin D                         | 5/15                                 | 6/24                             |
| <b>Echocardiography</b>           |                                      |                                  |
| EF (%)                            | 16.9 (13-37)                         | 22 (15-43)                       |

ACEi, angiotensin-converting enzyme inhibitor; ARB, angiotensin receptor blocker; BMI, body mass index; COPD, chronic obstructive pulmonary disease; DM, diabetes mellitus; eGFR, estimated glomerular filtration rate; Mann-Whitney-Wilcoxon test and Fischer exact were used to compare medians of continuous and categorical data between the two groups respectively. IQR, interquartile range; Statistical significance was recognized at  $P < 0.05$ .

**Figure S1. Proteoglycans and GAGs in healthy and failing hearts.**

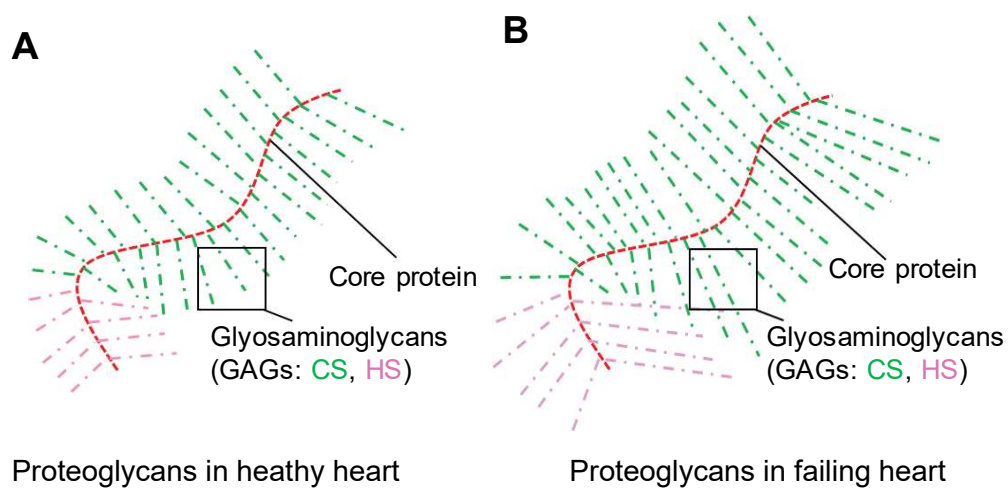

Schematic illustration of the general structure of proteoglycans and their side-branches of glycosaminoglycan (GAG) in a healthy heart (A) compared to a failing heart (B). CS, chondroitin sulfate; HS, heparin sulfate.
